# Supplementary material for: Pitfalls of Thrombotic Microangiopathies in Children: Two Case Reports and Literature Review
Source: MDPI journal article supplement (doi:10.3390/diagnostics13071228), 2023-03-24
Supplement: s1 [file s1]

Table S1. Case reports of pediatric patients in which COVID-19 infection has been suggested as triggering factor for either TTP or aHUS; Blue shaded – patients diagnosed with TTP; Orange shaded – patients diagnosed with aHUS; IUGR – intrauterine growth restriction; ASD – atrial septal defect; VSD – ventricular septal defect; PLT – platelets; Hb – hemoglobin; CS – corticosteroids; PEX – plasma exchange; HD – hemodialysis; FFP – fresh frozen plasma; R – recovery.

| Reference                  | Underlying condition | Age and sex | PLT (/mmc) | Hb (g/dl) | Creatinine (mg/dl) | ADAMTS1 3 activity | ADAMTS1 3 inhibitor | aHUS underlying mechanism | RT-PCR-SARS-CoV-2 | IgG SARS-CoV-2 antibody titer | Anti COVID-19 vaccine               | Clinical features                                                                                                                                                   | Treatment                          | Evolution |
|----------------------------|----------------------|-------------|------------|-----------|--------------------|--------------------|---------------------|---------------------------|-------------------|-------------------------------|-------------------------------------|---------------------------------------------------------------------------------------------------------------------------------------------------------------------|------------------------------------|-----------|
| Kasturiarachi et al., 2022 | Sjogren's syndrome   | 19 yo/ F    | 6000       | 8.5       | 1.17               | <3%                | 12                  | N/A                       | Negative          | elevated                      | N/A                                 | Headaches, vomiting, psychosis, seizures, fever, encephalopathy, left gaze deviation, right hemiplegia, hyperreflexia upper and lower limbs, hyperkinetic movements | CS, PEX, Rituximab, antiepileptics | R         |
| Vorster et al., 2022       | TTP (relapse)        | 19 yo/ F    | 7000       | 12.4      | N/A                | <5%                | N/A                 | N/A                       | Negative          | N/A                           | Pfizer-BioNTech mRNA vaccine dose 1 | Bruising, hemoglobinuria                                                                                                                                            | CS, PEX, Rituximab, Caplacizumab   | R         |

|                                            |                                                              |          |        |      |      |     |     |     |          |          |                                     |                                                       |                                                     |                                   |
|--------------------------------------------|--------------------------------------------------------------|----------|--------|------|------|-----|-----|-----|----------|----------|-------------------------------------|-------------------------------------------------------|-----------------------------------------------------|-----------------------------------|
| <b>Vorster <i>et al.</i>, 2022</b>         | Arrhythmia of unknown etiology, previously on metoprolol     | 15 yo/ F | 33,000 | 6.5  | N/A  | <5% | N/A | N/A | Negative | elevated | Pfizer-BioNTech mRNA vaccine dose 1 | Fatigue, bruising                                     | CS, PEX, Rituximab, FFP                             | R                                 |
| <b>Vorster <i>et al.</i>, 2022</b>         | ASD/VSD repaired; hormone suppression for precocious puberty | 17 yo/ M | 35,200 | 11.9 | N/A  | <5% | N/A | N/A | Negative | elevated | N/A                                 | Hematuria, jaundice, pallor, neurologic abnormalities | CS, PEX, Rituximab, Caplacizumab, FFP, Cyclosporine | Koate-DVI infusion s twice a week |
| <b>Dominguez-Rojas <i>et al.</i>, 2022</b> | None                                                         | 9 yo/ M  | 13,400 | 10.6 | 1.23 | 54% | N/A | N/A | Negative | elevated | N/A                                 | Fever, abdominal pain, generalized edema, erythema    | CS, PEX, Rituximab, FFP, Immunoglobulin             | Died                              |
| <b>Kirpalani <i>et al.</i>, 2022</b>       | Anxiety, iron deficiency                                     | 14 yo/ F | <1000  | 6.3  | N/A  | <1% | N/A | N/A | Negative | negative | Pfizer-BioNTech mRNA vaccine dose 1 | Fatigue, headache, confusion, bruising                | CS, PEX, Rituximab, Caplacizumab                    | R                                 |
| <b>Hamza <i>et al.</i>, 2022</b>           | None                                                         | 11 yo, M | 26,700 | 6.80 | 6.30 | N/A | N/A | N/A | Positive | N/A      | N/A                                 | Anasarca, papular skin rash, hematuria,               | CS, antibiotics, amlodipine, furosemide             | R                                 |

|                               |                |          |             |          |      |     |     |                          |          |          |     |                                                             |                                    |          |
|-------------------------------|----------------|----------|-------------|----------|------|-----|-----|--------------------------|----------|----------|-----|-------------------------------------------------------------|------------------------------------|----------|
|                               |                |          |             |          |      |     |     |                          |          |          |     | shortness of breath                                         |                                    |          |
| <b>Khandelwal et al.,2022</b> | None           | 4 yo, M  | 12,000<br>0 | 3.5<br>0 | 1.30 | N/A | N/A | Anti-Factor H antibodies | Negative | elevated | N/A | Anasarca, pallor, hypertension, fever 21 days prior         | CS, PEX, HD, i.v. cyclophosphamide | R        |
| <b>Khandelwal et al.,2022</b> | aHUS (relapse) | 12 yo, M | 55000       | 8.3<br>0 | 2.40 | N/A | N/A | Anti-Factor H antibodies | Positive | elevated | N/A | Abdominal pain, vomiting, fever 10 days prior               | CS, PEX, HD mycophenolate mofetil  | R        |
| <b>Khandelwal et al.,2022</b> | aHUS (relapse) | 13 yo, M | 60000       | 6.9<br>0 | 3.10 | N/A | N/A | Anti-Factor H antibodies | Negative | elevated | N/A | Abdominal pain, vomiting, hypertension, fever 8 days prior  | CS, PEX, HD mycophenolate mofetil  | R        |
| <b>Khandelwal et al.,2022</b> | aHUS (relapse) | 7 yo, M  | 35000       | 4.8<br>0 | 3.60 | N/A | N/A | Anti-Factor H antibodies | Negative | elevated | N/A | Abdominal pain, oliguria, hypertension, fever 10 days prior | CS, PEX, HD mycophenolate mofetil  | R        |
| <b>Khandelwal et al.,2022</b> | None           | 10 yo, F | 32000       | 5.8<br>0 | 7.60 | N/A | N/A | Anti-Factor H antibodies | Negative | elevated | N/A | Oliguria, pallor, hypertension, fever 10 days prior         | CS, PEX, HD i.v., cyclophosphamide | Dialysis |

|                                    |                                                              |                  |          |      |      |        |     |                                                                                  |          |      |     |                                                             |                                                                    |   |
|------------------------------------|--------------------------------------------------------------|------------------|----------|------|------|--------|-----|----------------------------------------------------------------------------------|----------|------|-----|-------------------------------------------------------------|--------------------------------------------------------------------|---|
| <b>Dalkıran <i>et al.</i>,2021</b> | None                                                         | 3 yo, F          | 62000    | 5.40 | 1.90 | > 5%   | N/A | Negative for CFH, CFI, other genetical alternative complement pathway components | Positive | N/A  | N/A | Fever, respiratory distress, hypertension                   | CS, PEX, HD, furosemide, albumin, antibiotics, i.v. immunoglobulin | R |
| <b>Searcy et al., 2022</b>         | None                                                         | 2 yo, F          | 51000    | 5.1  | 0.71 | >100%  | N/A | Unremarkable                                                                     | Positive | N/A/ | N/A | Bloody diarrhea, anasarca, jaundice                         | Supportive care                                                    | R |
| <b>Alizadeh <i>et al.</i>,2021</b> | IUGR, microcephaly, postnatal embolic, diabetic ketoacidosis | 16 months-old, M | < 10.000 | < 7  | 0.39 | Normal | N/A | Negative for anti-Factor H antibodies                                            | Positive | N/A  | N/A | Tachypnea, hypertension, edema, nephrotic-range proteinuria | Eculizumab, calcium-blockers, insulin                              | R |
